# Supplementary material for: The PVP-assisted construction of a Co3V2O8@NiCo LDH hierarchical structure for high-performance lithium-ion batteries
Source: Royal Society of Chemistry journal article supplement (doi:10.1039/d0nj01765e), 2020-01-01
Supplement: d0nj01765e1.pdf [file d0nj01765e1.pdf]

## Supplementary Information

### **PVP-assisted construction of $\text{Co}_3\text{V}_2\text{O}_8@\text{NiCo}$ LDH hierarchical structure for high-performance lithium-ion batteries**

Shuai Zhang,<sup>a</sup> Li Zhang,<sup>\* a, b</sup> Guancheng Xu,<sup>a</sup> Xiuli Zhang,<sup>a</sup> Aihua Zhao<sup>a</sup>

<sup>a</sup> Key Laboratory of Energy Materials Chemistry, Ministry of Education; Key Laboratory of Advanced Functional Materials, Autonomous Region; Institute of Applied Chemistry, Xinjiang University, Urumqi, 830046, Xinjiang, P. R. China

<sup>b</sup> Physics and Chemistry Detecting Center, Xinjiang University, Urumqi, 830046, Xinjiang, P. R. China

\* Corresponding author. E-mail: zhanglixju@163.com. Tel./Fax: +86-991-8580586

## Characterization materials

Morphologies and structure of  $\text{Co}_3\text{V}_2\text{O}_8@\text{NiCo LDH}$ ,  $\text{Co}_3\text{V}_2\text{O}_8$  and NiCo LDH. NiCo LDH were characterized by field-emission scanning electron microscopy (FESEM, Hitachi S-4800) and high-resolution TEM (HRTEM, JEOL, JEM-2100). The functional groups of products were performed on Fourier transform infrared (FTIR spectrum Bruker Vertex 70). The crystal structure of samples was conducted by powder X-ray diffraction (PXRD, Bruker D8 advance diffractometer, Cu  $K\alpha$  radiation,  $\lambda=0.15405$  nm). The elemental mapping and chemical composition were investigated by energy-dispersive X-ray spectroscopy (EDX) attached to the FESEM. The elemental valence was detected by X-ray photoelectron spectroscopy (XPS, ESCALAB 250 Xi) from Thermo Fisher Scientific.

## Electrochemical measurements

The lithium storage performance was evaluated by 2032-type cells. The lithium foil was regarded as counter electrode and Celgard 2300 as the separator. 1 M  $\text{LiPF}_6$  in ethylene carbonate (EC)/ethyl methyl carbonate (EMC)/dimethyl carbonate (DMC) (v:v:v = 1:1:1). The working electrode was prepared by mixing active materials (60 wt %), carbon black (30 wt %) and polyvinylidene fluoride (PVDF, 10 wt %) in N-methyl pyrrolidone (NMP). slurry of mixture was pasted onto Copper foil and dried at 80 °C in vacuum oven for 12 h. The average mass loading of active materials was  $\sim 0.6 \text{ mg cm}^{-2}$ . All cells were assembled in a glove box filled with argon. Cyclic voltammetry (CV) curves were tested by electrochemical workstation (CHI760D, Chenhua, China) within 0.01~3 V. Galvanostatic charge-discharge cycles were performed on battery testing system (Land CT2001A, Wuhan, China) with the voltage range of 0.01~3 V. Electrochemical impedance spectroscopy (EIS) were characterized by Zahner Elektrik electrochemical workstation within the frequency range of 0.01 Hz~100 kHz under open circuit voltage.

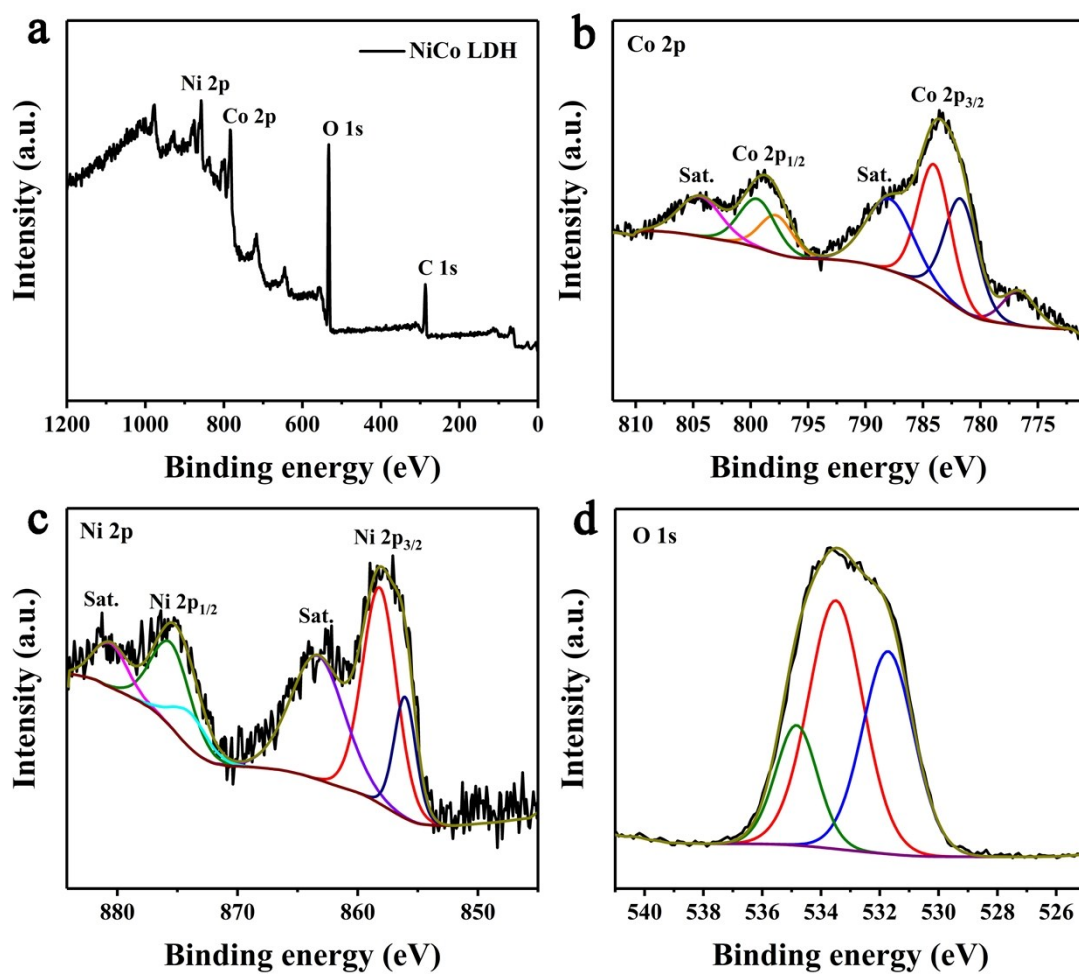

Figure S1. The XPS spectra of NiCo LDH: survey spectra (a), Co 2p (b), Ni 2p (c), O 1s (d)

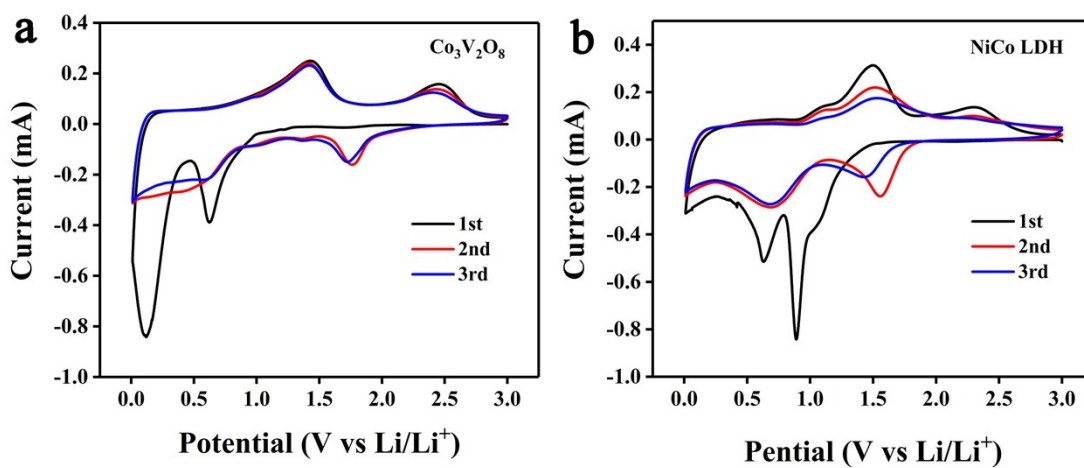

Figure S2. CV profiles of Co<sub>3</sub>V<sub>2</sub>O<sub>8</sub> (a) and NiCo LDH (b)

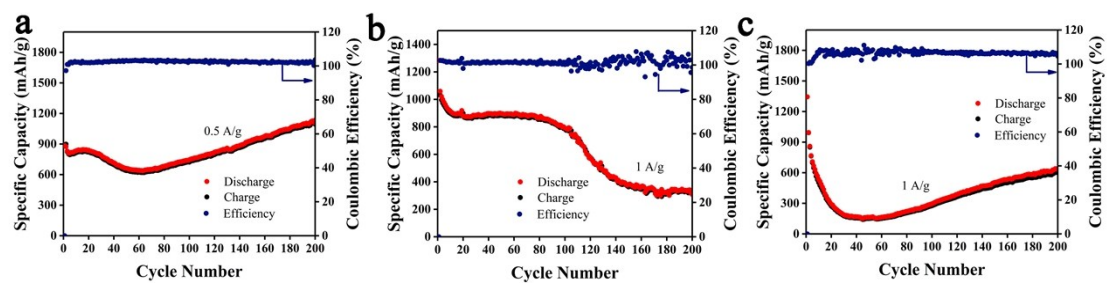

**Figure S3.** The cycle performance of  $\text{Co}_3\text{V}_2\text{O}_8@\text{NiCo}$  LDH (a),  $\text{Co}_3\text{V}_2\text{O}_8$  (b) and  $\text{NiCo}$  LDH (c)
